# Supplementary material for: The PIN gene family in cotton (Gossypium hirsutum): genome-wide identification and gene expression analyses during root development and abiotic stress responses
Source: PubMed Central journal article supplement (PMC5496148; doi:10.1186/s12864-017-3901-5), 2017-07-03
Supplement: 12864_2017_3901_MOESM1_ESM.pdf [file 12864_2017_3901_MOESM1_ESM.pdf]

**Table S4. Primers for qRT-PCR experiments.**

| <b>Gene ID</b> | <b>Sense primer sequence</b> | <b>Antisense primer sequence</b> |
|----------------|------------------------------|----------------------------------|
| GhPIN1-2-D     | ACCCATTATCCGGTTCCTAA         | TATGCCCTTCAACTTTCCCT             |
| GhPIN1-3-D     | ATGTTTACGGTTTGTCTGCC         | GTCGGATACAGGAGAAGCAC             |
| GhPIN1-4-A     | GTAATAAGGCAGCAACGAAC         | TGAATAAGCCAAGGCTAAAC             |
| GhPIN6-D       | GGGAGCAAACAAGAAATGCC         | ACTGAACATTGCCATCCCAA             |
| GhPIN8-2-A     | TGTTGGCTATGGGTCTCACT         | CGATAACGAAACGTCTCCTC             |
| GhPIN8-2-D     | AGTATTCGCCTTCGTTGTTT         | GCTTCCGTGTCTCTATGTC              |
| GhPIN1-1-D     | GTGTTACCGACCAGAAAGAA         | AAGCCTTGTCATTACACTCG             |
| GhPIN2-D       | TATTATCCGATGCTGGTCTG         | GTGCTAAGTATGTCGGGATG             |
| GhPIN8-1-D     | CAACCCTTACAAGATGAACC         | GTAGAACGACAATCTGAGCC             |
| GhPIN2-A       | TTTTCTATGGCAAGCCTTCA         | CGTATATGTCCTTTCCAGTGATCAT        |
| GhPIN1-4-D     | CCGTAATACTTTCCGTGATG         | TGTTGCCAATACCACTCCTA             |
| GhPIN8-1-A     | CAACCCTTACAAGATGAACC         | GTAGAACGACAATCTGAGCC             |
| GhPIN9-A       | GGTTGAGAGTGTGAAGCAAG         | CATCCCAAGACCTGCACT               |
| GhPIN3-D       | GGTGGGTATTGGTTGTGATAG        | AAGATAACCGCAGTGCTAAGA            |
| GhPIN6-A       | GGGAGCAAACAAGAAATGCC         | CTGAACATTGCCATCCCAAG             |
| GhPIN1-3-A     | ATGTTTACGGTTTGTCTGCC         | GGGAGACAGCCACTCTAACC             |
| GhPIN3-A       | ATCCGTACGAAGAACGCTAA         | TGCTCAGACCGTCCAGATTG             |
| GaPIN1-2       | GTGTTACCGACCAGAAAGAA         | AAGCCTTGTCATTACACTCG             |
| GaPIN1-3       | AGGGAAAGTTGAAGGGCATAG        | CACCTGTTGGAGGCATTGTA             |
| GaPIN1-1       | TATGGAGCAAACGAGCAGAA         | TTCGTGGTTGTTGGTCATTT             |
| GaPIN3         | CGGAATCCCAACACTTACTC         | AGTCCCAATAGAATGTAGTAAACC         |
| GaPIN5-1       | ACCGCCTCGTCTGCTATTTT         | TCTCCTGTTCTCCGCCATCT             |
| GaPIN6         | CATCCTCCATTTGCCTCACC         | GCATCCGACGAAGCATACCC             |
| GaPIN8         | TATCGGTGAAATGGTGGAAAG        | GCAAGAAATCGGCAAGTATG             |
| GaPIN2         | ACTCTTCTAAACCTACCCATCA       | TATCTCCAAATCCTTGTCCC             |
| GaPIN6-1       | TGATTCAAGTTGTGGTGCTG         | TGGTTAGATGATGTTGTGGC             |
| GaPIN5-2       | AACCGCCTCGTCTGCTATTT         | TCTCCTGTTCTCCGCCATCT             |
| GaPIN4         | AATCCCAATACATATTCCAGTC       | AAAGATAACCGCAGTGCTAA             |
| UBQ7           | GGCATTCCACCTGACCAACAA        | CCGCATTAGGGCACTCTTTTC            |
