# Supplementary material for: The PIN gene family in cotton (Gossypium hirsutum): genome-wide identification and gene expression analyses during root development and abiotic stress responses
Source: PubMed Central journal article supplement (PMC5496148; doi:10.1186/s12864-017-3901-5), 2017-07-03
Supplement: 12864_2017_3901_MOESM2_ESM.pdf [file 12864_2017_3901_MOESM2_ESM.pdf]

**Table S1. Analysis of *G. hirsutum* PIN genes and their corresponding orthologues in AA and DD genomes.**

| Gene ID     | Number of intron | Sub-genome | Orthologous        | Diploid cotton      | Name     |
|-------------|------------------|------------|--------------------|---------------------|----------|
| CotAD_03159 | 5                | At         | Cotton_A_13051     | <i>G. arboreum</i>  | PIN1-3-A |
| CotAD_68019 | 5                | At         | Cotton_A_31611     | <i>G. arboreum</i>  | PIN1-4-A |
| CotAD_23365 | 6                | At         | Cotton_A_29759     | <i>G. arboreum</i>  | PIN2-A   |
| CotAD_13788 | 5                | At         | Cotton_A_40424     | <i>G. arboreum</i>  | PIN3-A   |
| CotAD_05841 | 5                | At         | Cotton_A_19614     | <i>G. arboreum</i>  | PIN6-A   |
| CotAD_40873 | 5                | At         | Cotton_A_29004     | <i>G. arboreum</i>  | PIN8-1-A |
| CotAD_46231 | 2                | At         | Cotton_A_16465     | <i>G. arboreum</i>  | PIN8-2-A |
| CotAD_58548 | 4                | At         | Cotton_A_30421     | <i>G. arboreum</i>  | PIN9-A   |
| CotAD_21821 | 4                | Dt         | Gorai.008G290000.1 | <i>G. raimondii</i> | PIN1-1-D |
| CotAD_02796 | 5                | Dt         | Gorai.007G003800.1 | <i>G. raimondii</i> | PIN1-2-D |
| CotAD_70220 | 5                | Dt         | Gorai.006G191800.1 | <i>G. raimondii</i> | PIN1-3-D |
| CotAD_04916 | 1                | Dt         | Gorai.007G352200.1 | <i>G. raimondii</i> | PIN1-4-D |
| CotAD_43404 | 6                | Dt         | Gorai.009G001600.1 | <i>G. raimondii</i> | PIN2-D   |
| CotAD_74791 | 5                | Dt         | Gorai.002G179000.1 | <i>G. raimondii</i> | PIN3-D   |
| CotAD_69056 | 6                | Dt         | Gorai.005G082500.1 | <i>G. raimondii</i> | PIN6-D   |
| CotAD_47634 | 5                | Dt         | Gorai.012G056200.1 | <i>G. raimondii</i> | PIN8-1-D |
| CotAD_15657 | 3                | Dt         | Gorai.011G096500.1 | <i>G. raimondii</i> | PIN8-2-D |
