# Supplementary material for: The PIN gene family in cotton (Gossypium hirsutum): genome-wide identification and gene expression analyses during root development and abiotic stress responses
Source: PubMed Central journal article supplement (PMC5496148; doi:10.1186/s12864-017-3901-5), 2017-07-03
Supplement: 12864_2017_3901_MOESM3_ESM.pdf [file 12864_2017_3901_MOESM3_ESM.pdf]

**Table S2. The coding sequences of 17 GhPIN genes identified in *G. hirsutum*.**

>GhPIN1-2-D

**ATG**ATCTCCATTACAGATTTCTACCATGTCATGACTGCCATGGTTCCACTTTACGTGGCCATGGTTTTAGC  
TTATGGCTCGGTGAAATGGTGGAAAGATTTTCACCTCTGATCAGTGTTCCAGGCATCAACCGTTTTGTTGCTC  
TCTTTGCTGTCCCTCTCCTTTCTTTTCACTTCATCGCTTCTAATGACCCTTATTCTATGAACTTTTCGTTTCAT  
AGCTGCTGATACACTTCAAAACTTATAGTTCTTGCAGTACTTGTGTTTTGGACCAAGGTCAGTAAAAGAG  
GTTGTTTGGAAATGGACCATTACCTTTTTTCACTTTCTACTCTTCCAAACACTTTGGTTATGGGTATTCCCTT  
TACTTAAAGGAATGTATGGGGATTTTTCAGGGAGTTAATGGTGCAAATAGTTGTTCTTCAATGTATTATTT  
GGTACACTTTGATGCTTTTCTTGTGTTGAATATAGAGCGGCTAAAATGCTTATCTCTGAGCAATTTCCCGGC  
ACAGCAGGCTCTATTGTTTCTATCCATGTTGATTGATGTCGTGTCGCTTATGTTGTCGACAACCTATTGA  
AACCGAAGCTGAGATTAAGAAGATGGTAAGCTTCATATTACTGTCAGAAAATCCAATGCTTCAAGATCAG  
ATATTTTCTCAAGAAGTCCCATGGTTTTACATCTACAACCTCCAGTCCCTTGAATCTAACCAATGCTGAG  
ATATACTCTTTGCAATCATCGAGGAACCCAACCAAGAGGCTCGAGCTTTAACACACTGATTTTTTATTC  
CATGATGGCTGGGGACGCAATTCAAATTTTCGGTTCTGCAGATGTTTACGGTTTTGTCTGCTTCGCGTGGA  
CCAACCTCCGAGACCATCCAACCTATGAAGAGGATGGTGCAGCCGCTGGTAAACCGAGGTTCCATTACCAA  
GCACCAGGCGGTGGTGGCGGTGGTGGCGGTGCAACCCATTATCCGGTTCCTAATCCTGGTATGTTTTCG  
CCGACTGGTTCTAAACCCCTCGGTGGTGGTAATGCAAATGCAAATGCAAAGAGGCCTAATGGTTCATCCC  
CAACAAAAGTCTGAAGATGGCGGTAGGGATCTTCCAGTGTTTGTGTTGGAGTTCTAGCGCTTCTCCTGTTT  
CCGATGTCTTTGGCGGTACCGGCCATGATTACGGCGCTGCCGACCAGAAAGATGTTAGATTGGCTGTCT  
CCCAGGGAAAGTTGAAGGGCATAGAGAGAACCGTGAAGAGTACATGGAAAGAGAAGACTTGAGCTTCG  
CTAAAGGAGGAATGAACGGAGAAATGAACAAACACGAAGGTGACAAGGTGGGGGATGGCAATGGCAAG  
CCCAATACAATGCCTCCGACAAGTGAATGACAAGGCTGATACTGATCATGGTCTGGAGAAAGCTTATAA  
GGAATCCCAACACCTATTCAAGCTTGATAGGTCTCACTTGGTCTTAAATCTCGTTCAGGTGGAATGTAGAA  
ATGCCAGCGATTATAGCAAAGTCCATTTCAATTCTGTCAGATGCAGGACTTGGCATGGCCATGTTGAGTC  
TCGGTCTGTTTCATGGCATTGCAACCAAGGATCATAGCATGTGGGAATTCGGTTGCAGCTTTTGAATGGC  
CGTGAGATTCCTTACAGGTCCAGCTGTCATGGCAGCCGCTTCCATTGCTGTTGGTCTCCGTGGCGTTCTC  
TTACGGGTTGCCATTGTCCAGGCAGCTCTTCTCAAGGAATAGTACCCTTTGTCTTTGCAAAGGAATACA  
GCCTGCACCCTGATATTCTCAGCACAGCTGTAATCTTTGGGATGCTAATAGCTTTGCCATAACACTTGTCT  
TACTATATATTATTGGGGATATA**TAA**

>GhPIN1-3-A

**ATG**ATCACTTTAATTGACTTCTACCATGTAATGACTGCAATGGTGCCACTGTACGTGGCCATGATTTTAGC  
TTACGGCTCAGTGAAATGGTGGAAAGATCTTCTCTCCTGGTCAGTGTTCCGGGATTAATCGCTTTGTTGCT  
CTCTTTGCCGTCCCTCTCCTCTCTTTCCACTTCATCGCCTCTAACGATCCTTACGCTATGAACTTTGTTTT  
CATAGCAGCTGATACCCTCCAAAAAGTTATGGTTCTTGAATACTGGCAGTTTTGGTCCAAGGTGAGCAAA  
AGGGGTTGCTTGAATGGACCATCACCTATTTTCACTCTCTACTCTTCCCAACACTTTGGTGTATGGGCA  
TCCCTTTGCTGAAAGGAATGTACGGGGAGTTTTTCAGGAAGCTTAATGGTGCAGATAGTTGTCTTCAATG  
CATTATTTGGTACACTTTGATGCTTTTTCATGTTTGAATATAGAGGTGCCAAAATGCTGATATCTGAGCAATT  
CCCCGACACTGCTGGCTCTATTGTTTCAATCCATGTAGACTCAGATATCATGTCACTCGATGGTTCGACAA  
CCTCTAGAACTGAAGCTGAGATCAAAGAAGATGGTAAGCTCCATGTTACTGTCAGGAAATCCAATGCCT  
CAAGATCAGATATTTTCTCAAGAAGGTCCCAGGGTTTATCTTCAACAACCTCCACGCCCTTCCAATCTGACC  
AATGCTGAGATCTACTCGTTGCAATCATCAAGAAACCCAACCAAGAGGCTCAAGCTTTAATCACACTG  
ATTTCTACTCTATGATGGCTGGGGGACGCAACTCCAATTTTCGGTGTGTCAGATGTTTACGGTTTTGTCTGC  
CTCTCGAGGACCAACTCCCAGACCATCCAATTATGAGGAGGATGGTACAGGCATGGGTAAACCAAGGTT  
CCATTACCACGCACAAGGTGGCGCAGGTGCAGCCATTATCCGGCTCCTAATCCGGGTATGTTCTCTCC  
CAATGGGTCTAAAGCTAATACAAAGAAGCCTAACGATCAGGCTCAGCAAAAGGCTGAAGATGGTGGTAG  
GGATCTCCATATGTTTGTGAGTTCAAGTGCTTCTCCTGTATCCGACGCTTTTGGTGGTGGTGGTGGC  
CATGAATATGGAGCAAACGAGCAGAAAGAGGTTAGAGTGGCTGTCTCCCAGGGAAAGCGGAAGGACAT  
AGAGAGAATAACGAGGAGTACATGGAGAGAGAGGATTTTCAGCTTTGGGAACCGAGGATTGGAACGAGAA  
ATGACCAACAACCACGAAGGTGACAAAGTGGGGGATGGCAAGCCCAAACCTATGCCTCCTGCAAGTGTCT  
ATCACAAGGCTGATACTGATCATGGTTTGGAGAAAGCTTATCAGAAATCCCAACACCTATTCAAGCTTAAT  
AGGACTCACTTGGTCTAATCTCATTGAGTGGAAATGTACAAATGCCTGCCATAATAGCCAAGTCCATTT  
CCATACTGTCAGATGCAGGGCTTGGCATGGCCATGTTGAGTCTTGGTCTGTTTCATGGCATTGCAACCGAG  
GATCATAGCATGTGAAATTTCCGTTGCAGCTTTTGGCATGGGTGTGAGATTCTTGCAGGTCAGCTGTG  
ATGGCAGCCGCTTCCATAGCTGTGCGACTCCGTGGCGTTCTTACACGTTGCCATTGTGCAGGCAGCT  
CTCCCACAAGGCATTGTCCCCTTCGTCTTTGCCAAGGAATACAACCTACACCCTGATATTCTCAGCAGCT  
CTGTTATTTTTGGAATGCTAATAGCCTTGGCCATAACGCTTGTCTACTACATTTTATTGGGATTA**TGA**

>GhPIN1-4-D

ATGATCAGTGCAACAGACCTTTACCATGTCCTCACCGCCGTTGTACCTCTCTACGTAGCCATGATTTTAGC  
TTACGGTTCAGTCAAATGGTGGAAAATCTTCACCCCGCATCAATGTTCCGGGCATCAACCGTTTCGTCGCT  
TTATTTGCCGTCCTTTACTTTCAATTCATTTCAATCACTAACAATCCATACACCATGAACCTTGAAGTTC  
ATAGCCGCTGATACCCTTCAAAGCTCATCGTCTAGTACTTTTAGCCATATGGTCAAGAAGTCAAG  
GGTTCCTTAGAATGGTCCATAACCTTATTTTCACTCTCAACACTCCCAATACTTTAGTAATGGGCATCC  
CTTTGTTAAAAGGCATGTATGGGGATTATTCAGGGAGTTAATGGTTCAAATAGTGGTTTTACAATGTATA  
ATTTGGTACACTTTGATGTTATTCTTGTGTTGAATATCGTGGTGTAAAGCTATTAATAGCTGAACAATCCCA  
GATACTGCTGGTTCATAAATTTCAATTAAGTGGATTCTGATGTTTTGTCATTAGATGGTAAAGAACCTTTA  
CAAACCGATGCTGAAGTCCGGTGTATGATGGGAACTTCATGTTACTGTAAGGAAATCACTAGCTCAAGAT  
CGGAAATCTTTTCTCGCCGGTACATGGTGTGAATCCGGTATGGGGTTAACACCAAGACCTTCTAATTTA  
ACCAATGCTGAAATTTATCACTTCAATCATCTAGGAATCCAACACCAAGAGGTTCTAGTTTTAACATACT  
GATTTTTATCAATGGTGAACGGGGGAAGAACAATGTTAGTCCAAGGCAATCAAATTTATGGGATAGGAT  
TTGATGAAGAGAATGGCGTTGGGATGTTTGGTAATAATGGTATAAGATCAAATGGTAGTTTCATATCCTGCT  
CCGACAAGTGTGGAATCTTTTCTCGGTGACTGCTCCCAAGAAGGCAAACGGTGGCGGTGACGGTGGT  
GGAAAGGATTTGCATATGTTTGTGGAGTTCAAGTGCTTCCCCTGTTTCTGAAGGTGGTATACATGTTTT  
CAAAGGTGGAGATTATGGCAATGATCATCATATAAAGATTATGATGAATATGGTAGAGACGAATTCACTT  
TCGGTAATAAGGCAGCAACGAACGGTGGTGCCGATCGAGAAGGACCGGTTCTTTCCAAGCTTGGTTCAA  
GTTCCACGACTGAACTTAACCCGAAGATTGAAACAAAGCCGGCCGCTATGCCTCCGGCTAGTGTATGAC  
TAGACTTATATTGATCATGGTGTGGCGAAAATAATCCGGAATCCCAACACTTACTCGAGTTTGATCGGTC  
TCACTTGGTCTCTTGTTCGTTCAAGTGAATATCCAAATGCCTGCTATAGTAGCCGGTTCGATATCGATT  
CTTTCCAATGCAGGTCTCGGAATGGCCATGTTAGCCTTGGCTTATTCATGGCACTTCAACCAAGGATAAT  
TGCATGCGGGAACACGATCGCGACCTTTGCCATGGCGGTTCCGTTCTAACCGGTCTGCGGTTATGGC  
AGCTGCCTCGATCGCTGTTGGGTTAAGAGGTGTTCTTCTCCGCATTGCTATCGTGCAGGCAGCTCTTCCA  
CAAGGGATCGTACCTTTCTGCTTTGCAAAGGAGTACAATGTTTCATCCTGATATATTGAGCACAGGGGTTAT  
ATTTGGAATGCTGATTGCCCTTCCATAACACTGGTTTACTACATTCTATTGGGACTTTGA

>GhPIN6-A

ATGATAACAGGGGGTGATTTTTACAAGGTGATGTGTGCGATGGTTCCTGTATTTTCGCAATGATAATAG  
CGTACGGATCGGTGAAATGGTGGCGAATATTCAGCCCGGAGCAGTGTTCGGGGATCAACCGGTTTCGTG  
GCGGTTTTCGCGGTGCCGGTGTGTCATTCCATTTCATAGCTCAAACAACCCGTACCAGATGGACACCA  
AGTTCATCATAGCGGACACGGTGTCCAAGGTGTTGGTCCCTTGTCTTTCGTTTTGGGCTATCTTCTT  
CCCTGGTGGCTCACTCGATTGGCTCATCACCTTTTCTCCCTCGCCACTTTGCCAACACTCTCGTCAATG  
GCATCCCCTTGGTAAATGCTATGTATGGAGATTTCACTCAAAGTCTCATGTTTCAACTCGTTGTTCTTCA  
ATGCATCATCTGCTACACACTATTGCTATTCCTCTTCAATACAGGGCGCAACGCTCTTAATCAAACCC  
AGTTCGCGGGCCACAGCTGCCACCATTTCAAATTCGAGCTCGACAACGACGTCATTTTCATTGGACG  
GTCGTGATCCTCTCCGTACAGAATCCGAAACCGACATCAACGGCCGTATTTCGAGTCCGAATCAGGCGGT  
CCACGTCATCGGCTCCGGAATCGGCTCTATCATCCTCCATTTGCCTCACCCCTAGAGCATCCAACCTCTC  
TAACGCCGACATATTTTCCGTTAACACCCCGGCGGACCCAACAATAACGAGATTGTATTCTGTAACGGC  
GACATGGGGTTCGGTTACCGTGCCGTTAGCCCCGTTTGTCCGGGTATGCTTCGTCGGATGCTTACTCT  
TTGCAGCCGACCCCAAGGGCTTCTAATTTTAAATGAAATGGATGTGATTACTACGGCAGCCGGGAATACAC  
CAATTTGGATGAGGTCTCCCGTGGCTGGTGGGAAAGTTTTCCGGCAGCCGTCTCCGGTGGTTCCTCCTA  
CAAAAATGGTTTGGGACTGTCAAGATGGTGGTGGGGATGATAATAGGCAGGGCTTCAAAGACCTTGGGG  
AGAAGGAAATTAGCTTTAGAGACAACACCAAATAACAGTGGCGGAGATGAATGGAGATGGGAAGGAAG  
GTGAAGTGGGGAGCAAACAAGAAATGCCAAAGGCCATAGTGTGGTGGAGACTCATTTTAATTGTTGTTGG  
AAGGAAGCTTTCTCGAAACCTAATACTTACTCAAGCATCTTAGGGCTTCTTGGTCTCTCATCTCTTCA  
AGTGAATGTAGGGATGCCGAGTTTGGTCAAGTATTCAATAAAAATAATCTCCGATGCTGGCCTTGGGAT  
GGCAATGTTAGTTTGGGTTATTTATGGCACTTCAGCCAAGGATTATTGCATGTGGAACAAAAGAGCA  
ACAATGGGGATGGTGAATCGTTTCTGTGTGGCCCTGTAATAATGTCCACTGTATCGATAGCTCTGGGAT  
TAAGAGGGGCAAACTACATGCTGCCATCGTACAGGCAGCCCTTCCCAAGGTATCGTACCATTCTGCTT  
TGCAAGAGAATACGGTTTACATCCCGACATATTAAGTACTGGGTAA

>GhPIN3-A

ATGTTATCCACTGCTGCTAGCTTGTACCCTTTGTATGTGACTGTTGGTGGCATTGTGGCTTGTTTAAACC  
ATCTGCTTTTGTGTTGCTGGAGAGAGGACCTTCTTCATATAGCTTCTCGCTTGGGTTGATTATGTTGG  
CTATGGGTCTCACTTTAGAAGTCAAGGACTTGTCAATTTGTTACCCAAGACCTCTTTCTATTCTATTTG  
GATGTGTTGCTCAGTACACAATTATGCCAACTTTTGTATGATTATTAGCAAACTTTGGGGCTTTACCA  
TCTCTTTCTGTTGGTTTGAATTTGCTAGGTTGTTGTCCTGGTGGTGTGCATCCACTGTGGTGGCCTTTAT  
TGCACGAGGAGACGTTTCTGTTATCGACGGTGTGACGGTTTGCCTACTCTTGGTGCAGTGATCCTTACA  
CCTCTTTTACTATGGTTCTAGCAGGAACATATGTTTCTATTGATGCTATTGGACTTTCCATCAGCACCT

GCAGGTGGTAGTGGCTCCGGTTTTGATCGGTTCTTACCTACAAAGCACATTTCTTTGGTGGTGAAAATG  
ATTACACCATTTGCTCCTTTATTTGCCGTTTTACTTTTCATCGCTACTTGCATGCAGTGTTTTCTCGGGAAAT  
GTCGTCCGTTTTAATTCCTCAATAGGTAATGCATCATTGTTTTCCGATGCCTCTTTAGTCTCACGCCTCCA  
ATCATTATTATCTGGAGGCGTCCGGTCCGTAATACTTTCCGTGATGTTGCTACATTTTACTGGTTTTCTTTG  
TAGGGTACATATCAGCAACCATTTGTAGATTCCGAGAAGCAGAGCGGCGAGCAATATCAATCGAGGTTG  
GCATGCAAAATTTCTTATTAGGAGTGGTGTGGCAACAACCTATTTCACTTCTCCAGTTGTAGCGTTACCG  
CCTGCCATGTCGGCAGTGATTATGAATATAATGGGTAGCAGCTTAGGCTTCTTTTGGAGACAGATCAGTG  
GTTCAAACAGGAACCTGAAGATCAAGAGTGA

>GhPIN8-2-D

ATGAACATCAAACCTCGTACTTGGCCGACTTTCTTCAGAAAGTATTGCGCTTCGTTGTTTTGATTGCCGTTGG  
ACAACCTCCGATCTCGGGGCGGTGAGCCGTCTATCATAACTGGCTTCTCGTTATCGACCTTGCCTAACACT  
TTGATCTTGGGGATACCGTTGTTGAAGGCCATGTATGGTGACGAACCGGCCGGATTACTGGCTCAGATT  
GTTGTTCTTCAAAGCTTGATTTGGTATAATTTACTGTTGCTCATGTTGAGTTCAATGCTGCAAAGCCAGC  
CTCTGAGATTACATCAACTTCAGAAGACATAGAGGACACGGAAGCACAAGGGAAGAGAGAGAAGAAGA  
GGCAGAAACCAGAGCAAGCAAATTCAGATTATGCTCATTTTTCTTACTGTGGAAAAGAAGCTGGTGGCA  
AATCCCAACACTCATGCAGCTTGGCTGGGTCTCATTGGGCTGGCATTGATTGAGGTGGGAAATAAAT  
TCCCTGCCATTATTCAGAATTCATTATCAATATTAGCTAGCGGAGGACTTGGTCTATTTATGGCATCACAG  
CGTAGCAGAATAGCATGTGGTATACGAATGACAGCAGTAGCCATGGTCATGAATTCATGGCTGGTCCAG  
CTCTAATTGCAGCATCCTCAGCTGCCTGGGACTTCGGGCAGATTATTA

>GhPIN1-1-D

ATGATCACTTTAACAGATTTTTACCATGTTATGACCGCAATGGTACCCTTTACGTGGCCATGATTTTAGCT  
TACGGTTTCAAGTAAATGGTGGAAAATCTTCACACCCGACCAATGTTCCGGCATCAACCGTTTTGTTGCTC  
TTTTCGCCGTTCCATTACTTTTCAATTCATTTTCATAGCTTCAAACAATCCGTACACCATGAACTTCCGGTTCA  
TAGCAGCTGATACTACAAAAGATTATAGTTTTAGTTCGTGTTAGCCATTTGGTCCAAAGTAAGTAAAAGG  
GGTTGTTTAGAATGGACCATAACATTTTCACTTTCAACATTACCCAATACTTTAGTTATGGGTATACCT  
TTACTTAAAGGTATGTATGGTGAATTTTCAAGGAGTTTAAATGGTACAAATCGTTGTACTTCAATGTATCATT  
TGGTATACTTTAATGCTATTTATGTTTGAATATCGAGGTGCTAAGATGTTAATCTCTGAACAATCCCCGAC  
ACTGCTGGTTCTATTGTGTCTATCCATGTGATTCCGACATCATGTGCTCGCTCGACGGTCGGCAGCCGTTAG  
AAACCGAAGCTGAGATTAAGACGACGCGTAAGTTGCATGTTACGGTCCGAAAATCTAATGCTTCGAGGTC  
TGATATTTTTTCGAGAAGGTCACAAGGTTTTGCTTTCGACTACCCCCCGCCTTCGAATTTAACGAATGCTG  
AGATTTACTCTTTACAATCATCGAGGAATCCAACACCGAGAGGTTTCGAGTTTTAACATACTGATTTTTATT  
CTATGATGGCCGGTGGTCCGAACTCGAACTTTGGTTCCGGTGATGTTTATGGTATGTCTGCTTCACGTGG  
ACCGACACCCAGACCATCAAATTACGAGGAAGATGGTTCTGGTAAGCCGAGGTTCCATTACCATGGACAA  
AGTGGTGTAAACGGGACACTACCCGGCTCCTAATCCGGGTATGTTTTACCAACTGGGTCTAAAGGTGTTA  
AGAAACCTAATGGACAAGCTCATCAAAGGTTGAAGATGGTGGTGGTAAGGATCTTCATATGTTTGTGTTG  
GAGTTCAAGTGCTTCTCCGGTATCAGATGTGTTCCGGCGGCGGCTATGAATATGGTGTACCGACCAGAAA  
GAAGTTCCGGTTAGCTGTCTCCCCTGGCAAAGTGAAGGACATAGAGATAATCAAGAGGAGTTTATGGAAA  
GAGATGAGTTTCAAGTTTGGGAACAGAAGAGAAATGAACAATGTCCAAGAAAGTGGTAAAACAACAAGT  
TGGGGAAGCCATTGCCATTGCTAACCCTAAAACCATGCCACCAACGAGTGAATGACAAGGCTTATATTG  
ATTATGGTTTTGGAGAAAACCTATTAGAAACCCCAATACTTATTCAAGCTTAATTGGTCTCACTTGGTCATTA  
ATCTCATTGAGGTGGAATGTGGAATGCCTGCAATAATAGCAAAGTCGATATCTATACTGTGAGATGCAG  
GTCTCGGCATGGCTATGTTTCAAGTCTTGGTCTGTTTATGGCATTGCAACCAAGATCATAGCATGTGGGAA  
TTCGGTTGCAGTTTTGCAATGGCCGTGAGATTCTTACAGGACCAGCTGTCATGGCTGCTGCTTCCATT  
GCTGTTGGTCTTAAAGGCGTTCTTACACGTTGCCATTGTCCAGGCAGCTCTCCACAAGGAATTGTCC  
CTTTTGTCTTTGCCAAGGAATACAACGTACACCCTGATATTCTCAGCACAGCGTAA

>GhPIN2-A

ATGATCACTGGAAAGGACATATACGACGTTCTGGCAGCTATTGTGCCCTATATATTGCTATGATGTTAGC  
ATATGGTCCGTGAGGTGGTGGAAAATATTTACCCAGATCAATGTTTCAGGCATCAACCGTTTTTGTGCA  
GTGTTTGCAGTTCCGTTACTCTCCTTCCATTTTCATCTCCTCAAATGATCCATATGCTATGAACTACCACTC  
ATAGCTGCCGATTCTCTCCAGAAGGTAGTCATCCTCGTTGCCCTTTTCTATGGCAAGCCTTACCCAAC  
ATGGCAATCTGGAGTGGATGATTACTCTTCTCTCTATCCACTCTCCCAACACTCTTGTGATGGGGATC  
CCCCTTTTAAAGGCTATGTACGGGGATTTCTCCGGCAGCCTTATGGTTCAAATTGTAGTTTTGCAGAGTGT  
GATTTGGTACACTCTCATGCTTTTTCATGTTTGAATATAGAGGAGCAAAGCTTCTGATCAACGACCAGTTCC  
CGGAGACTGCTGGATCTATTACCTCTTTCCGTGTAGAGTCGGATGTTGTTTCACTTAATGGCCGCGAGCC  
TCTACAAGCTGACGCTGAGATTGGTGTGACGGAAAACCTCCACGTTGTGGTGGAGAAGATCAAGTGCGTC  
ATCAATGGTATCGTCTTTAGCAAATCACATGGACTGAATTCCTTAACGTCCATGACTCCCAGAGCCTCAA  
ACCTTACCGGGGTAGAAATATACTCTGTCCAGTCATCCAGAGAGCCCACTCCCAGGGCTTCAAGCTTTAA  
TCAAACGATTTCTATGCCATGTTTGAAGCAAGGCTCCAAGTCCAAGCATGGCTACACCAACAGCTTC



TAGCAATATTATCCGATGCTGGTCTGGGAATGGCAATGTTTAGTCTAGGCTTATTCATGGCATTACAACCC  
AAGATCATAGCTTGTGGAAAATCTGTAGCAACATTTTCCATGGCTGTCAGGTTTTTACTGGTCCCCTGT  
CATTGCTGCAACCTCCATAGCCATTGGTCTTCGTGGGGTCTTTTTGCATGTCGCTATCGTTCAGGCTGCC  
CTTCCACAAGGAATAGTTCCATTTGTGTTTGCCAAGGAGTATAACGTTCCATCCCGACATACTTAGCACTGC  
GGTATTTTCGGAATGTTGATTGCTCTGCCATTACAATACTCTACTATGTGCTTCTGGACTG**TAA**

>GhPIN8-2-A

**ATG**TCCTTCACTTTAACCCACAGACTCTGCCTTTCACCACCACAACGAACCCATCTCAGATTACCTTCAA  
ACCCACACATCAAACCCATAGTTTCTTACCATCAAACCTCAGTTACCTTCCCATAGTCAGTTCTCTCA  
GTCATAATTCTGAACACTTATCGGTCACTCAAGCAAACCCAGATGGGAGAACATGTTATCGACTGCTGC  
TAGCTTTTACCCTTTGTATGTGACTGTTGGTGGCATTGTGGCTTGTTTAAGCCGTCTGCTTTTCTGGT  
TCGTGGAGAGAGGACCTTCTTCATATAGCTTCTCGCTTGGGTTGATTATGTTGGCTATGGGTCTCACTTTA  
GAACTCAAGGACTTGGCTCAATTTGTTACCCAAAGACCTCTTCTATTCTATTTGGATGTGTTGCTCAGTA  
CACAATTATGCCAACTTTTTGCTATGGTTATTAGCAAACCTTTGGGGCTTTCACCATCTCTTTCTGTTGGTTT  
GATTTTGTAGGTTGTTGCTCCTGGTGGTGCATCCACTGTGGTGACCTTTATTGCACGAGGAGACGTT  
TCGTTATCGACGGTAATGACGGTTTGCCTACTCTTGGTGCAGTGATCCTCACACCTCTTTTACTGTGAT  
TCTAGCAGGAACATATGTTTCTGTTGATGCTATTGGACTTTCATCAGCACCTGCAGGTGGTTGTGGCT  
CCGGTTTTGCTCGGTTCTTACCTACAAAGCACATTTCTTTGGTGGTGAAAATGATTACACCATTTGCTCC  
TTTATTTGCCGTTTTACTTTTCATCGCTACTTGCATGCAGCATTTTCTCGGGAAATGTCGTCCGTTTTAAGTC  
CTCAATAGTTAATGCATCATTGGCTTCCGATGCCTCTTATGCTCACGACTCCAATCATTATTATCCGGAG  
ACCTCGGTGCCGTAATACTTTCCGTGATGTTGCTACATTTTATCGGTTTCTTTGTAGGGTACATATCAGCA  
GCCATTTGTAGATTCCGAGAAGCAGAGCGGCGAGCAATATCAATCGAGGTGCACATCTCCGAGTTTTATA  
CCAAATCCCTTATGAACTCTTATATATTGCATTACATGTGTTTGTGAAATCTCCCACTCAGGTTGGCAT  
GCAAATTCCTTATTAGGAGTGGTATTGGCAACAACCTATTTCACTTCTCCGGTGGTAGCGTTACCGGGC  
GCCATGTCGGCAGTGATTATGAATATAATGGG**TAG**

>GhPIN8-1-D

**ATG**ATTTCCCTGGCAGATGTTTATCATGTTATAGCAGCCACCGTGCCTTTATACTTTGCCATGATTTTAGC  
CTACGTATCGGTGAAATGGTGGAAAGCTGTTACACCCGGAACAATGCGCAGGCATCAACAAGTTCGTGGC  
TAAATTCTCAATCCCCTCTTGTCTTTCCAAGTCATCTCCGAAAACAACCCTTACAAGATGAACCTCAAAC  
TACTTTGCCGATTTCTTGCAAAAACCTATTGGCTTTCTTGTCTTGTGTTGCCCTACTAAGCTCAGTTCCC  
GGGGTGGTTTGTGCTCCATCATAACCGGTCTCTCTTTATCCACCATGCCTAACACCTTAATCCTCGGAAT  
CCCCTGTTGAGGGCTATGTATGGGGATAAATCAGCCACTCTTTTGGCTCAGATTGTCGTTCTACAAAGC  
TTAATTTGGTATAATTTACTCTTGTGTTTTGTTGAGCTAAACGCTACCAAAGCTGCCTCTGAGATCACTGTT  
GCAGTTTACAAGCCTCAGGGGACGAAGAGGCCCCCGAAGAAGCACAAGGGAANGAGACACAAACGAG  
AGCAAGGAAATCCAAGACAATGCTGATTTTCTGACAGTGGGGAAGAAGCTAGTGGCGAACCCCAATAC  
CCATGCTACCTTACTTGGTCTTATTTGGGCAAGCATTCAATTCAGGCTGTGGAACATTAATTTCCCGCCA  
TTGTTGAAAATCAATAGCAATATTATCCAGTGGAGGACTTGGTATGGCAATGTTAGCTTAGGTCTATTC  
ATGGCATCACGGCCAAGCATAATAGCTTGTGGTATACGAATGGCGACAGTAGCCATGATCATGAAATTCA  
TTGCTGGTCCAGCTCTAATGGCGGCCGCTCCACCCTCTCGGACTTAAAGGCAAATTTATTGAGAGTAGC  
AATTGTACAGGCTGCTCTCCCTCAAGGAATCGTTCCATTTGTTTTGCCAAAGAGTACAATGTTATCCTG  
ATATATTAAGCACAGGGTAATCTTTGGTATGCTTATTGCCTTACCTGTAGCATTGGTCTACTATCTTCTTT  
TAGCATTG**TGA**

>GhPIN9-A

**ATG**ATTGGCATCAAGGATCTGTACAGTGTCTGACTGCAGTTGTTCTCTTTATGTCACCATGTTCTTGGC  
TTATGGTTTCAGTAAAATGGTGGAAAGTATTCACCCCGAACAATGTGCCGGCATCAACAGATTCGTGCC  
ATCTTCGCCGTTCCGCTCCTCTCCTTCGAGTTCGTTTCGAGGATAAATCCTTACAAAATGGACCTCCTTTT  
CCTTGCCGCTGATGGAGTCTCAAAGTCTGATATTGTTTGTCTTTGCTTTGTTGGGCAATTTACAAAGA  
GAGGGCCCTGGACTGGTCTATCACAGTTTTCTCACTTTCCACACTCCCAAACACTCTTGTGATGGGGAT  
TCCCCTACTGAAATCCATGTATGGGGATGACAAGGAATACTAATGATTCAAGTTGTGGTGTGCAATGC  
ATAATCTGGTATACCCTATTACTGTTTTTGTGAAATATAGAGAAAACAAGAACTGAAGTCTTGAGCAAGTTC  
AAGGAAAGTAGTGTTAGTTCTAAGAACTGTTGCAGTGAAGATGAAGTCATTAATGTTATTGCCACAACATC  
ATCTAACAGCAGCAGCAGCAGCAGCAGCAGCAGCGCTCAAATGCAAACAAGATTGCACCAGATCAATCTCA  
GCGATTCAGGCCTATGGTAGCAGCATCGATGGAGGGTGGAGGATGGGACAAGTACTACCTGTGAGAAGCA  
GTCAGTGAAGCTGGTCAAAGAGAAGAAAGCAGTAGTACTGCAAAGGGGGTTGAGAGTGTGAAGCAAGA  
GAATGTCGAAAATGCTAGCATTCCCTCTTCTTTTTCTCCATCAATGCTCCTCAAATATTGAGAAAAGTCTG  
GCTCAAGCTTGTGAGGAACCCTAACTCTTACTCAAGTTTGTGGTCTTAGCTGGGCTTTAGTCTCTTGC  
AGATGGGACATAAAGAAGCCCAAATAATGAAAATTCAGTCACGATATTGTCAAGTGCAGGTCTTGGGA  
TGGAATGTTTAGCCTTGGATTATTCATGGCTTTGCAACCAAGGATCATTGCCTGTGGAAGAAGCTGGC

TTTATATGGGATGGTAGCTAGGTTTATAGCAGGACCGGCAGTAATGGCGATAGCATCCATCGCAGTTGGC  
CTCAAAGGCACTACCTTAAAGTTGTCTATTGTACAAGCAGCATTGCCTCAAGGAATTGTCCCTTTCGTTTT  
TTCTAGGGAGTATAATCTGCATCCTGATGGTGATATTTGGAATGATAGTTTCTCTGCCATAACAATAGTA  
TATTACATTGTGTTGGGTATTTGAGGAGTCATATTTGGAAGGATGAAAACATAAACATGAGGAACTCAGCA  
GCATTGTTGAGAGATCCAGGGTTATGGTCAAACCAGCAGCAGCAATATTCATATGTTTTTGTGCTGA  
GTTGA

>GhPIN1-4-A

ATGATTAGTTGGAACGATCTTTACACCGTTTTAACGGCGGTGATCCCACTGTACGTTGCTATGATCTTGGC  
TTACGGCTCCGTCCGTTGGTGGAAAATATTCACCCCCGACCAGTGCTCGGGTATCAACCGCTTTGTGCGC  
CATATTTGCCGTTCCCTCTCTTGTCTTTCCACTTCATTTCCACCAATGACCCTTATGCCATGAACTTCAGGTT  
CGTAGCAGCCGACACCCTTCAAAGCTCATCATGCTCTTCGTTCTTGATTGTGGACTAATTTAAACAAGG  
AACGGAAGCCTAGAATGGATGATCACCATTTTCTCTTTATCTACTCTCCCCAACACTCTAGTCATGGGCAT  
TCCCTTTTTAATCGCTATGTACGGTCCCTACTCCGGGATGCTCATGGTCCAAGTCGTGGTTCTCCAGTGT  
ATCATTGGTACACCCTTCTCTTTTCTTTTTGAGTACCGCGGTGCCAAAATCCTCATCATGGAGCAGTT  
TCCCGAAACTGCAGCTTCCATTGTTTCTTTCAAAGTTGATTCCGATGTGGTTTCACTTGACGGCCGCGACT  
TCCCTGAAACCGACGCTGAAATCGGGGAAGACGGCAAGCTACACGTTAAGGTCAGGAAATCTAATGCTT  
CCAGGAGGTCTTTGGGGCCTTGTCCCTTCTGCATTGACTCCCAGGCCTTCCAACCTCACC GGAGCTG  
AAATCTACAGTTTGAAGCTTTCAAGGAACCCACGCCAAGAGGTTCCAATTTCAACAACCTCCGACTTTTAC  
TCCATGATGGGTGTTCAAGGATTTCTGCAAGACACTCCAATTTCCGGTCCAGCTGATTTATACTCTGTTCA  
ATCCTCTAGAGGACCTACTCCAAGGCCATCCAATTTGAAGAAAACAATACAGTAATGTCTCCACGATTTG  
GATTTTATCCAGCACAGACTGTTCCCTTCATCCTACCCTGCTCCAAACCCTGAATTCTCATCCGTCACGAAG  
AACGCTAAAGCTACCCAACAACAACAGCAGCAGCCAGTTCAACCACAGCAGCAGCCTAAGGAGAAGGAG  
AATAATAAAGAGAATCATGATGCCAAGGAATTGCACATGTTTGTGTGGAGTTCAAGTGCCTCGCCGTTT  
CAGAAGGCGGAGGTCTCCATGTCTTTGGTGGTACAGATTTCCGAGCGTCCGAGCAATCTGGACGGTCTG  
AGCAGGGTGTAAAGAGATAAGGATGTTGGTCCGAGATCACCCCTCAAACGGGGAAAACAAAGGCATGA  
CAGGCAGTGGTGACGTTAATGGAGAGGACTTTAGCTTTGCTGGAAGAGATGGGGAAAGAGGAGAGAGAAA  
AGGAAGGACCCAATGGTCTCAATAAGTTGGGGTCTAGTTCAACGGCCGAGTTGCACCCTAAAGCCGCCG  
GAGGGCCTGAGTCTGGCGTAGGCAAACAATGCCGCCGGCGAGTGTAATGACCCGCTTAATCTTGATCA  
TGGTCTGGCGCAAGCTTATACGAAACCCCAACACATATTCCAGTCTCATCGGGCTGGTTTGGTCCCTAAT  
TGCTTTCAGGTGGCATGTGAGTATGCCGAAAATAATAGAGAAGTCTATCTCCATCCTGTGAGATGCTGGA  
CTAGGAATGGCCATGTTTAGCTTAGTAAGCGGTCCAGGGTCCGGTGGGTATTGGTTGTGATAGACGCCAA  
TTAGGCCACCAGTTAGTGAAGGTAGGTCTGTTTATGGCACTGCAACCCAAGATCATCGCTTGTGGGAAC  
CTGTAGCTACATTTGCCATGGCCGTTAGGTTCTTAACCGTCCGGCTGTGATGGCTGCCGCTTCCGATTGC  
AGTAGGGTTGCGCGCACACTCCTCCGTGTCGCCATTGTTCCAGGCGGCTCTGCCACAAGGAATTGTACC  
ATTTGTGTTCCGCAAGGAATAACAATGTCCACCCTGCAATTTAGCACTGCGGTTATCTTTGGGATGTTGA  
TAGCATTACCAATAACGCTGGTGTACTACATTCTTCTAGGATTGTGA

>GhPIN6-D

ATGATAACAGGGGGGGGATTTTTACAAGGTGATGTGTGCGATGGTTCCTACTGATTTTCGCAATGATAGTAG  
CGTACGGATCGGTGAAATGGTGGCGAATATTCAGCCCGGAGCAGTGTTCCGGGGATCAACCGGTTTCGTG  
GCGGTTTTCGCGGTGCCGGTGTGTCATTCCATTTTCATAGCTCAAACAACCCGTACCAGATGGACACCA  
AGTTCATCATAGCGGACACGGTGTCCAAGGTGTTGGTCCCTTGCCTTTCGTTTGGGCTATCTTCTT  
CCCTGGTGGCTCACTCGATTGGCTCATCACCCTTTTCTCCCTCGCCACTTTGCCAACACTCTCGTCATG  
GGCATCCCTTGTCTAATGCTATGTATGGAGATTTCACTCAAAGTCTCATGGTTCAACTCGTTGTTCTTCA  
ATGCATCATCTGGTACACACTATTGCTGTTCTTTTCAATACAGGGCGGCAACGCTCTTAATCAAACCC  
AGTTCCCGGGCCCCACAGCTGCCACCATTTCAAATTTGAGCTCGACAACGACGTTATTTTATTGGACGG  
TCGTGATCCTCTCCGTACAGAATCCGAAACCGACATCAACGGCCGATTCGAGTCCGAATCAGGCGGTC  
CACGTCATCGGCTCCGGAATCGGCTCTATCATCCTCCATTTGCCTCACCCCCAGAGCATCCAACCTCTCT  
AACGCCGAAATATTTTCCGTTAACACCCCCGGCGGACCCAACAATAACGAGATTGTATTCTGTAACGGCG  
ACTTGGGGTTCCGTTACCGTGCCGTTAGCCCCGTTTGTCCGGGTATGCTTCGTCCGATGCTTACTCTTT  
GCAGCCGACCCCAAGGGCTTCTAATTTTAAATGAAATGGATGTGATTACTACGGCAGCCGGGAATACACCA  
ATTTGGATGAGTCTCCCGTGGCTGGTGGGAAAGTTTTCCGGCAGCCGTCTCCGGTGGTCTTCTCTTACA  
AAAATGGTTTTGGGACTGTCAAGATGGTGGTGGGATGATAATAGGCAGGGCTTCAAAGACCTTGGTGAG  
AAGGAAATTAGCTTTAGAGACAACACGAAAATAACAGTGGCGGAGATGAATGGAGATGGGAAAGAAGGT  
GAAGTGGGAGCAAACAAGAAATGCCAAAGGCCATAGTGATGGTGAGACTCATTTTAATTGTTGTTGGAA  
GGAAGCTTTCTCGAAACCCTAATACTTACTCAAGCATCTTAGGGCTTCTTTGGTCTCTCATCTCTTTCAAG  
TGAATGTAGGGATGCCGAGTTTGGTCAAGTATTCAATAAAAATAATCTCCGATGCTGGCCTTGGGATGG  
CAATGTTCAAGTTTGGGTTATTTATGGCACTTCCAGCCAAGGATTATTGCATGTGGAACAAAAGAGCAACA  
ATGGGGATGGTATTGTTTTCTGTGTGGCCCTGTAATAATGTCCACTGCATCGATAGCTCTGGGATTAA

GAGGGGCAAAACTACATGCAGCCATCGTACAGGCAGCCCTTCCCCAAGGTATCGTACCATTTCGTCTTTG  
CAAGAGAATACGGTTTACATCCCACATATTAAGTACTGGGGTTATTTTTGGCATGTTGGTGTATTGCCT  
GTGACACTTCTGTATTACATACTTTTAGGCATATGA

>GhPIN1-3-D

ATGATCACTTTAACTGACTTCTACCATGTAATGACTGCAATGGTGCCACTTTACGTGGCCATGATTTTAGC  
TTACGGCTCAGTGAAATGGTGGAAAGATCTTCTCTCCTGGTCAGTGTTCCGGGATTAATCGCTTTGTTGCT  
CTCTTTGCCGTCCCTCTCCTCTCTTTCCACTTCATCGCCTCTAACGACCCTTACGCTATGAACTTTGTTTT  
CATAGCAGCTGATACCCTCCAAAAAGTTATGGTCTTGAATACTGGCAGTTTGGTCCAAGGTGAGCAA  
AGGGTTGCTTGAATGGACCATCACCTATTTTCACTCTCTACTCTTCCCAACACTTTGGTGATGGGCA  
TCCCTTTGCTGAAAGGAATGTACGGGGAGTTTTAGGAAGCTTAATGGTGCAGATAGTTGTCCTTCAATG  
CATTATTTGGTACACTTTTATGCTTTTTCATGTTTGAATATAGAGGTGCCAAAATGCTGATATCTGAGCAATT  
CCCCGACACTGCTGGCTCTATTGTTTCAATCCATGTAGACTCAGATATCATGTCACTCGATGGTCCGCAA  
CCTTTAGAACTGAAGCTGAGATCAAAGAAGATGGTAAGCTCCATGTTACTGTCAGGAAATCCAATGCCT  
CAAGATCAGATATTTTCTCAAGAAGGTCCCAGGGTTTATCTTCAACAACCTCCACGCCCTTCCAATCTGACC  
AATGCTGAGATCTACTCGTTGCAATCATCAAGAAACCCAACACCAAGAGGCTCAAGCTTTAATCACACTG  
ATTTCTACTCTATGATGGCTGGGGGACGCAACTCCAATTTCCGGTGTGCAGATGTTTACGGTTTTGCTGCTG  
CTCTCGAGGACCAACTCCCAGACCATCCAATTATGAGGACGATGGTACAGGCATGGGTAAACCAAGGTT  
CCATTACCACGCACAAGGTGGCGCAGGTGCAGCCCATTATCCGGCTCCTAATCCGGGTATGTTCTCTCC  
CAATGGGTCTAAAGCTAATACAAAGAAGCCTAACGATCAGGCTCCGCAAAGGCTGAAGATGGTGGCAG  
GGATCTTCATATGTTTGGAGTTCAAGTGCTTCTCCTGTATCCGACGTCTTTGGTGGTGGTGGTGGC  
CATGAATATGGAGCAAACGAGCAGAAAGAGGTTAGAGTGGCTGTCTCCCAGGGAAAGCGGAAGGACAT  
AGAAGAAATAACGAGGAGTACATGGAGAGAGAGGATTTAGCTTTGGGAACCGAGGATTGGAACGAGAA  
ATGACCAACAACCACGAAGGTGACAAAGTGGGGGATGGCAAGCCAAAACCTATGCCTCCTGCAAGTGTG  
ATCACAAGGCTGATACTGATCATGGTTTGGAGAAAGCTTATCAGAAATCCCAACACTTATTCAAGCTTAAT  
AGGACTCACTTGGTCTCTAATCTCATTAGGTGGAATGTACAAATGCCTGCCATAATAGCCAAGTCCATTT  
CCATACTGTCAGATGCAGGGCTTGGCATGGCCATGTTTCACTTGGTCTGTTTCAATGGCATTGCAACCGAG  
GATCATAGCATGTGAAATTCCGTTGCAGCTTTTCCATGGGTGTGAGATTCTTGCAGGTCCAGCTGTG  
ATGGCAGCCGCTTCCATAGCTGTCCGACTCCGTGGCGTTTCTTACACGTTGCCATTGTGCAGGCAGCT  
CTCCCACAAGGCATTGTCCCCTTTGTCTTTGCCAAGGAATACAACCTACACCCTGATATTCTCAGCACTG  
CTGTTATTTTTGGAATGCTAATAGCCTTGGCCATAACGCTTGTCTACTACATAGTATTGGGATTA

>GhPIN3-D

ATGATTAGTTGGAACGATCTTTACACCGTTTTAACGGCGGTGATCCCACTGTACGTTGCTATGATCTTGGC  
TTACGGCTCCGTCCGTTGGTGGAAAATATTCACCCCCGACCAGTGCTCGGGTATCAACCGCTTTGTGCGC  
CATATTTGCCGTTCTCTCTTTGCTTTTCCACTTCATTTCCACCAATGACCCTTACGCCATGAACTTCAGGTT  
CATAGCAGCCGACACCCTTCAAAGCTCATCATGCTCTTCTGTTCTTGGATTGTGGACTAATTTAACAAGGA  
ACGGAAGCCTGGAATGGATGATCACCATTTTCTTTTATCTACTCTCCCTAACACTCTAGTCATGGGTATT  
CCTCTTTTAAATCGCTATGTACGGTCCCTACTCCGGGATGCTCATGGTCCAAGTCGTGGTTCTCCAGTGTA  
TCATTTGGTACACCCTTCTTCTTTTCTTTTGGAGTACCGCGGTGCCAAAATCCTCATCATGGAGCAGTTT  
CCCGAAACTGCAGCTTCCATTGTTTCTTTCAAAGTTGATTCCGATGTGGTTTCACTTGACGGCCGCGATT  
CCTCGAAACCGACGCTGAAATCGGGGAAGACGGCAAGCTACACGTTAAGGTCAGGAAATCTAATGCTTC  
CAGGAGGTCTTTGGGGCCGTGTTCCCTTCTGCTTACTCCAGGCCTTCCAACCTCACCGGTGCTGA  
AATCTACAGTTTGGAGCTTCAAGGAACCCACGCCAAGAGGTTCCAATTTCAACAACCTCCGATTTTTACT  
CCATGATGGGTGTTCAAGGATTTCTGCAAGACTCCAATTTCCGTCAGCTGATTTATACTCTGTTCAA  
TCTCTAGAGGACCTACTCCAAGGCCATCCAATTTGAAGAAAACAATACAGTAATGTCTCCACGATTCCG  
GATTTTATCCAGCACAGACTGTTTCTTTCATCCTACCCTGCTCCAAACCTGAATTCTCATCCGTCACGAAG  
AACGCTAAAGCTACCCAACAACAACAGCAGCAGCCTAGGGAGAAGGAGAATAATAAAGAGAATCATGAT  
GCCAAGGAATTGCACATGTTTGTGTGGAGTTCAAGTGCTTCCGCGTTTTCAGAAGGCGGAGGTCTCCAT  
GCTTTTGGTGGTACAGATTTCCGAGCGTCCGAACAATCTGGACGGTCTGAGCAGGGTGTAAAGAGATA  
AGGATGTTGGTTCGACATCACCCTCAAACGGGGAAAACAAGGCATGGCAGGCAGTGGTGCAGTTTCAT  
GGAGAGGACTTCAGCTTTGCTGGAAGAGATGGGGAAGAAGAGAGAGAAAAGGAAGGACCAATGGTCT  
CAATAAGTTGGGGTCTAGTTCAACGGCCGAGTTGCACCCTAAAGCCGCGGAGGGCCGAGTCTGGCG  
TAGGCAAAACAATGCCCGCCGCAAGTGAATGACGCGCTTAATCTTGATCATGGTCTGGCGCAAGCTTAT  
CCGAAACCCAAATACATATTTCCAGTCTCATCGGCTGGTTTGGTCCCTAATTGCTTTTCAAGTGGCATGTG  
AGTATGCCGAAAATAATAGAGAAGTCTATCTCCATCCTGTGAGATGCTGGACTAGGAATGGCCATGTTTA  
GCTTAGGTCTGTTTATGGCACTGCAACCCAAGATCATCGCTTGTGGAACTCTGTAGCTACATTTGCCAT  
GGCCGTTAGGTTCTTAACTGGTCCGGCTGTGATGGCTGCCGCTTCCGATTGCAGTAGGGTTGCGCGGCAC  
ACTCCTCCGTGTGCCATCGTTCAGGCGGCTCTGCCACAAGGAATTGTACCATTTGTGTTCCGCAAGGAA

TACAATGTCCACCCTGCGATTCTTAGCACTGCGGTTATCTTTGGGATGTTGATAGCATTACCAATAACGCT  
GGTGTACTATATTCTTCTAGGATTG**TGA**
