# Supplementary material for: The PIN gene family in cotton (Gossypium hirsutum): genome-wide identification and gene expression analyses during root development and abiotic stress responses
Source: PubMed Central journal article supplement (PMC5496148; doi:10.1186/s12864-017-3901-5), 2017-07-03
Supplement: 12864_2017_3901_MOESM4_ESM.pdf [file 12864_2017_3901_MOESM4_ESM.pdf]

auxin efflux carrier (AEC) domain

GhPIN6-A MITGGEFFYKVMCAVPLVYFAMIIAYGVSVKWRIFFSPEQCSGINRFVAVFAVPVLSFHFFIA 60  
GhPIN6-D MITGGEFFYKVMCAVPLVYFAMIIAYGVSVKWRIFFSPEQCSGINRFVAVFAVPVLSFHFFIA 60  
GhPIN1-3-A MITLLIDFYHVMTAMVPLVYVAMILAYGVSVKWKKIFSPGQCSGINRFVALFAVPLLSFHFFIA 60  
GhPIN1-3-D MITLLIDFYHVMTAMVPLVYVAMILAYGVSVKWKKIFSPGQCSGINRFVALFAVPLLSFHFFIA 60  
GhPIN1-1-D MITLLIDFYHVMTAMVPLVYVAMILAYGVSVKWKKIFTPDQCSGINRFVALFAVPLLSFHFFIA 60  
GhPIN1-2-D MITLLIDFYHVMTAMVPLVYVAMILAYGVSVKWKKIFTPDQCSGINRFVALFAVPLLSFHFFIA 60  
GhPIN1-4-D MISATDLYHVLTAIVPLVYVAMILAYGVSVKWKKIFTPDQCSGINRFVALFAVPLLSFHFFIS 60  
GhPIN1-4-A MISWINDLYTVLTAIVPLVYVAMILAYGVSRRWKKIFTPDQCSGINRFVALFAVPLLSFHFFIS 60  
GhPIN3-D MISWINDLYTVLTAIVPLVYVAMILAYGVSRRWKKIFTPDQCSGINRFVALFAVPLLSFHFFIS 60  
GhPIN2-A MITGKDIYDVLAIVPLVYVAMILAYGVSRRWKKIFTPDQCSGINRFVAVFAVPLLSFHFFIS 60  
GhPIN2-D MITGKDIYDVLAIVPLVYVAMILAYGVSRRWKKIFTPDQCSGINRFVAVFAVPLLSFHFFIS 60  
GhPIN8-1-A MISLADGVYHVIATAVPLVYFAMILAYVSVKWKKIFTEPQACAGINKFVAKFSIPLLSFQVVIS 60  
GhPIN8-1-D MISLADGVYHVIATAVPLVYFAMILAYVSVKWKKIFTEPQACAGINKFVAKFSIPLLSFQVVIS 60  
GhPIN8-2-D ----- 0  
GhPIN9-A MGIKILLYSVLTAIVVPLVYVTEFLAYGVSVKWKKVFTPEQACAGINRFVALFAVPLLSSEFFIS 60  
GhPIN3-A ----- 0  
GhPIN8-2-A --MSFTLTHRLCLSPFQRTHTKPHSTSKPTVSSPSKLSYLPVSSLSHNSHLSVTVQ 58

GhPIN6-A SNNPYQMDTKFFIADTVSKVLVLAIVSVVAIFFPFGGSLDWLITLFSLATLPLNTLVMGIPIL 120  
GhPIN6-D SNNPYQMDTKFFIADTVSKVLVLAIVSVVAIFFPFGGSLDWLITLFSLATLPLNTLVMGIPIL 120  
GhPIN1-3-A SNDPYAMNFRFIAADTLQKVMVLGILAVVSKVSKRGCLEWTTITLFSLSTLPLNTLVMGIPIL 120  
GhPIN1-3-D SNDPYAMNFRFIAADTLQKVMVLGILAVVSKVSKRGCLEWTTITLFSLSTLPLNTLVMGIPIL 120  
GhPIN1-1-D SNNPYAMNFRFIAADTLQKILVIVLVAIWSKVSKRGCLEWTTITLFSLSTLPLNTLVMGIPIL 120  
GhPIN1-2-D SNDPYAMNFRFIAADTLQKILVIVLVAIWSKVSKRGCLEWTTITLFSLSTLPLNTLVMGIPIL 120  
GhPIN1-4-D TNNPYAMNFRFIAADTLQKILVIVLVAIWSRTSSRGSLEWSTITLFSLSTLPLNTLVMGIPIL 120  
GhPIN1-4-A TNDPYAMNFRFIAADTLQKILVIVLVAIWSRTSSRGSLEWSTITLFSLSTLPLNTLVMGIPIL 120  
GhPIN3-D TNDPYAMNFRFIAADTLQKILVIVLVAIWSRTSSRGSLEWSTITLFSLSTLPLNTLVMGIPIL 120  
GhPIN2-A SNDPYAMNFRFIAADSLQKVVILVALFLWQAFTHKCNLEWMTITLFSLSTLPLNTLVMGIPIL 120  
GhPIN2-D SNDPYAMNFRFIAADSLQKVVILVALFLWQAFTHKCNLEWMTITLFSLSTLPLNTLVMGIPIL 120  
GhPIN8-1-A ENNPYKMNLLIILADFLQKLLAFVLFALIKLSSRGGSSITIGLSLSTMPNTLILGIPIL 120  
GhPIN8-1-D ENNPYKMNLLIILADFLQKLLAFVLFALIKLSSRGGSSITIGLSLSTMPNTLILGIPIL 120  
GhPIN8-2-D -----MNIKLVILADFLQKVFVAVVLIIVGQLRSRGGESSITIGLSLSTLPLNTLILGIPIL 54  
GhPIN9-A RINPYKMDLLFLAAGGVSKVLILFALLCWANFTKRGGLDWSITVFSLSTLPLNTLVMGIPIL 120  
GhPIN3-A -----MLSTAASLYPLVYVTEGGIVACFKPSAFAWFVERGPPSSYSFSLGLIMLAMGLITL 53  
GhPIN8-2-A AKPRINENMLSTAASLYPLVYVTEGGIVACFKPSAFAWFVERGPPSSYSFSLGLIMLAMGLITL 118

GhPIN6-A LNAMYGDFTEQSLMVQIVVVLQCIWYTLVLLFLFEYRAATLLIKTOFFPGFTAATISKFELDN 180  
GhPIN6-D LNAMYGDFTEQSLMVQIVVVLQCIWYTLVLLFLFEYRAATLLIKTOFFPGFTAATISKFELDN 180  
GhPIN1-3-A LKGMGYEFGSGLMVQIVVVLQCIWYTLVLLFLFEYRAAKLLISQFP-DTAGSIVSIHVDS 179  
GhPIN1-3-D LKGMGYEFGSGLMVQIVVVLQCIWYTLVLLFLFEYRAAKLLISQFP-DTAGSIVSIHVDS 179  
GhPIN1-1-D LKGMGYEFGSGLMVQIVVVLQCIWYTLVLLFLFEYRAAKLLISQFP-DTAGSIVSIHVDS 179  
GhPIN1-2-D LKGMGYEFGSGLMVQIVVVLQCIWYTLVLLFLFEYRAAKLLISQFP-DTAGSIVSIHVDS 179  
GhPIN1-4-D LKGMGYDYSGLMVQIVVVLQCIWYTLVLLFLFEYRAKLLISQFP-DTAGSIVSIHVDS 179  
GhPIN1-4-A LNAMYGDFTEQSLMVQIVVVLQCIWYTLVLLFLFEYRAKLLISQFP-DTAGSIVSIHVDS 179  
GhPIN3-D LNAMYGDFTEQSLMVQIVVVLQCIWYTLVLLFLFEYRAKLLISQFP-DTAGSIVSIHVDS 179  
GhPIN2-A LKAMYGDFTEQSLMVQIVVVLQCIWYTLVLLFLFEYRAKLLISQFP-DTAGSIVSIHVDS 179  
GhPIN2-D LKAMYGDFTEQSLMVQIVVVLQCIWYTLVLLFLFEYRAKLLISQFP-DTAGSIVSIHVDS 179  
GhPIN8-1-A LRAMYGDKSATLTAQIVVVLQCIWYTLVLLFLFEYRAKLLISQFP-DTAGSIVSIHVDS 161  
GhPIN8-1-D LRAMYGDKSATLTAQIVVVLQCIWYTLVLLFLFEYRAKLLISQFP-DTAGSIVSIHVDS 161  
GhPIN8-2-D LKAMYGDEPAQLTAQIVVVLQCIWYTLVLLFLFEYRAKLLISQFP-DTAGSIVSIHVDS 95  
GhPIN9-A LKSMYGDKEYLMTQVIVVVLQCIWYTLVLLFLFEYRAKLLISQFP-DTAGSIVSIHVDS 179  
GhPIN3-A ELKDLLNLFTRPSTLIFGCVAQYTTMPTFAMISKTLGLSPSLSVGLLILGCCPGGAAS 113  
GhPIN8-2-A ELKDLLNLFTRPSTLIFGCVAQYTTMPTFAMISKTLGLSPSLSVGLLILGCCPGGAAS 178

GhPIN6-A DVISLDGRDPLRTHSETDINGRIRVRRRSTSSAP-----ESALSSSICLTPRASNLN 234  
GhPIN6-D DVISLDGRDPLRTHSETDINGRIRVRRRSTSSAP-----ESALSSSICLTPRASNLN 234  
GhPIN1-3-A DIMSLDGRDPLETEAEIKEDGKLVTVRKSNASRSDIFSRSSQGLSS---TTPRPSNLTN 236  
GhPIN1-3-D DIMSLDGRDPLETEAEIKEDGKLVTVRKSNASRSDIFSRSSQGLSS---TTPRPSNLTN 236  
GhPIN1-1-D DIMSLDGRDPLETEAEIKEDGKLVTVRKSNASRSDIFSRSSQGLSS---TTPRPSNLTN 236  
GhPIN1-2-D DVVSLDGRDPLETEAEIKEDGKLVTVRKSNASRSDIFSRSSQGLSS---TTPRPSNLTN 236  
GhPIN1-4-D DVVSLDGRDPLETEAEIKEDGKLVTVRKSNASRSDIFSRSSQGLSS---TTPRPSNLTN 239  
GhPIN1-4-A DVVSLDGRDPLETEAEIKEDGKLVTVRKSNASRSDIFSRSSQGLSS---TTPRPSNLTN 233  
GhPIN3-D DVVSLDGRDPLETEAEIKEDGKLVTVRKSNASRSDIFSRSSQGLSS---TTPRPSNLTN 233  
GhPIN2-A DVVSLNGRDPLETEAEIKEDGKLVTVRKSNASRSDIFSRSSQGLSS---TTPRPSNLTN 239  
GhPIN2-D DVVSLNGRDPLETEAEIKEDGKLVTVRKSNASRSDIFSRSSQGLSS---TTPRPSNLTN 239  
GhPIN8-1-A ETTVAVSQASGGEAPEEAQGRGGGEETQTRARRS----- 198  
GhPIN8-1-D ETTVAVSQASGGEAPEEAQGRGGGEETQTRARRS----- 192  
GhPIN8-2-D ETTVAVSQASGGEAPEEAQGRGGGEETQTRARRS----- 125  
GhPIN9-A EVINVIATSSNQOQQOQTQANANKIAPDQSQFRPMVAASMEGEDGTSTTCEKQSVQA 239  
GhPIN3-A TVVTFIARGDVSLSVTVCTTLAGVILTPLLMVLAVL-----TYVVIDAIG 160  
GhPIN8-2-A TVVTFIARGDVSLSVTVCTTLAGVILTPLLMVLAVL-----TYVVIDAIG 225

|            |                                                              |     |
|------------|--------------------------------------------------------------|-----|
| GhPIN6-A   | AETFSVNTPPGGENNNEIVFCNGELMGFGYRAVSPR-----LSGYASSDAYSLQPT     | 283 |
| GhPIN6-D   | AETFSVNTPPGGENNNEIVFCNGELMGFGYRAVSPR-----LSGYASSDAYSLQPT     | 283 |
| GhPIN1-3-A | AETYSLQSSRNPTPRGSSFNHTDFYSMMAGG----RNSNF----GAADVYGLSASRGPT  | 287 |
| GhPIN1-3-D | AETYSLQSSRNPTPRGSSFNHTDFYSMMAGG----RNSNF----GAADVYGLSASRGPT  | 287 |
| GhPIN1-1-D | AETYSLQSSRNPTPRGSSFNHTDFYSMMAGG----RNSNF----GSADVYGLSASRGPT  | 287 |
| GhPIN1-2-D | AETYSLQSSRNPTPRGSSFNHTDFYSMMAGG----RNSNF----GSADVYGLSASRGPT  | 287 |
| GhPIN1-4-D | AETYSLQSSRNPTPRGSSFNHTDFYSMMVNGG----KNNVS----PRQSNYGLGFDEENG | 290 |
| GhPIN1-4-A | AETYSLSSRNPTPRGSSFNNSDFYSMMGVQGFPARHSNF----GPADLYSVQSSRGPT   | 288 |
| GhPIN3-D   | AETYSLSSRNPTPRGSSFNNSDFYSMMGVQGFPARHSNF----GPADLYSVQSSRGPT   | 288 |
| GhPIN2-A   | VETYSVQSSREPTPRASSFNQNDFYAMFASKAPSPKHGYTNSFQGAVGDVHSLQSSKGA  | 299 |
| GhPIN2-D   | VETYSVQSSREPTPRASSFNQNDFYAMFASKAPSPNHGYNNSFQGAVGDVHSLQSSKGA  | 299 |
| GhPIN8-1-A | -----                                                        | 196 |
| GhPIN8-1-D | -----                                                        | 192 |
| GhPIN8-2-D | -----                                                        | 125 |
| GhPIN9-A   | QREESSSTAKGVESVKQENVENASIPSSFS-----                          | 270 |
| GhPIN3-A   | LSLSHLLQVVVAEVLIG-----                                       | 176 |
| GhPIN8-2-A | LSLSHLLQVVVAEVLIG-----                                       | 241 |
|            |                                                              |     |
| GhPIN6-A   | PRASNEN-----                                                 | 290 |
| GhPIN6-D   | PRASNEN-----                                                 | 290 |
| GhPIN1-3-A | PRPSNYEEDGTGMGKPRFHYHAQGG-----AGAAHYPAFNPFGMFSPNGSK-----     | 332 |
| GhPIN1-3-D | PRPSNYEEDGTGMGKPRFHYHAQGG-----AGAAHYPAFNPFGMFSPNGSK-----     | 332 |
| GhPIN1-1-D | PRPSNYEEDGS--GKPRFHYHGQS-----GVTGHYPAPNPFGMFSPTGSK-----      | 329 |
| GhPIN1-2-D | PRPSNYEEDGAAAGKPRFHYQAPGGGG---GGGGATHYPVFNPGMFSPTGSKPLGGGNA- | 343 |
| GhPIN1-4-D | VGMFGNNGIRS-----NGSSYPAPTSAGLFSPVTAP-----                    | 321 |
| GhPIN1-4-A | PRPSNTEENNTVMSPRFGFYPAQTVP-----SSYPAPNPEFSSVTKNAKATQQQQ-     | 338 |
| GhPIN3-D   | PRPSNTEENNTVMSPRFGFYPAQTVP-----SSYPAPNPEFSSVTKNAKATQQQQ--    | 337 |
| GhPIN2-A   | PRPSNTEDEMLKVAKRRGRSMSGELYNGGGGGVPSYPPNPFIAGSTSGGSKKKEGSGS   | 359 |
| GhPIN2-D   | PRPSNTEDEMLKVAKRRGRSMSGELYNGGGGGVPSYPPNPFIAGSTSGGSKKKEGSGS   | 359 |
| GhPIN8-1-A | -----                                                        | 196 |
| GhPIN8-1-D | -----                                                        | 192 |
| GhPIN8-2-D | -----                                                        | 125 |
| GhPIN9-A   | -----                                                        | 270 |
| GhPIN3-A   | -----                                                        | 176 |
| GhPIN8-2-A | -----                                                        | 241 |
|            |                                                              |     |
| GhPIN6-A   | -----EMDVIITTAAGNTPITWM                                      | 306 |
| GhPIN6-D   | -----EMDVIITTAAGNTPITWM                                      | 306 |
| GhPIN1-3-A | -----ANTKKPNDQAQQAEDGGRDLHMFVWS                              | 359 |
| GhPIN1-3-D | -----ANTKKPNDQAQQAEDGGRDLHMFVWS                              | 359 |
| GhPIN1-1-D | -----GVKKPNGQAHQKVEDGGGKDLHMFVWS                             | 356 |
| GhPIN1-2-D | -----N--ANAKRPNHGHPQKSEDDGGRDLHMFVWS                         | 371 |
| GhPIN1-4-D | -----KKANGGGDGGGKDLHMFVWS                                    | 341 |
| GhPIN1-4-A | -----QQPVPQQQPKEKENNKENHDAKDLHMFVWS                          | 369 |
| GhPIN3-D   | -----QQQPREKENNKENHDAKDLHMFVWS                               | 362 |
| GhPIN2-A   | MPNKKELHMGGRSMSGELYNGGGVPSYPPNPFIAGSTSGGSKKKEIGAMPNKDLHMFVWS | 419 |
| GhPIN2-D   | MPNK-----DLHMFVWS                                            | 371 |
| GhPIN8-1-A | -----                                                        | 196 |
| GhPIN8-1-D | -----                                                        | 192 |
| GhPIN8-2-D | -----                                                        | 125 |
| GhPIN9-A   | -----                                                        | 270 |
| GhPIN3-A   | -----                                                        | 176 |
| GhPIN8-2-A | -----                                                        | 241 |
|            |                                                              |     |
| GhPIN6-A   | RSPVAGGKVFRRQSP-----VVPPTKMVWDCQDGGDDNRQGFKDLGE              | 349 |
| GhPIN6-D   | RSPVAGGKVFRRQSP-----VVPPTKMVWDCQDGGDDNRQGFKDLGE              | 349 |
| GhPIN1-3-A | SSASPVSDFVFGGGG-----HEYGANEQKEVRVAVSPGKAEGHRENNEEYMER        | 407 |
| GhPIN1-3-D | SSASPVSDFVFGGGG-----HEYGANEQKEVRVAVSPGKAEGHRRNNEEYMER        | 407 |
| GhPIN1-1-D | SSASPVSDFVFGG-----YEGVTDQKEVRVAVSPGKVEGHGHDNQEEMER           | 402 |
| GhPIN1-2-D | SSASPVSDFVGGTG-----HDYGAADQKDVRVAVSPGKVEGHRENREEYMER         | 418 |
| GhPIN1-4-D | SSASPVS-----EGGIHVFKGGDYGNDHHHKDYDEYGR                       | 374 |
| GhPIN1-4-A | SSASPVEGGGLHVFGGTDGFGASEQSGRSEQGAKEIRMLVADHPQNGENKGMTGSGDVNG | 429 |
| GhPIN3-D   | SSASPVEGGGLHVFGGTDGFGASEQSGRSEQGAKEIRMLVADHPQNGENKGMAGSGDVHG | 422 |
| GhPIN2-A   | SSASPVEGNLRHAVN-----RAASTDFDSSKPTHQQENAASRAMHELINM           | 466 |
| GhPIN2-D   | SSASPVEGNLRHAVN-----RAASTDFDSSKPTYQQENAASKAMHELINM           | 418 |
| GhPIN8-1-A | -----                                                        | 196 |
| GhPIN8-1-D | -----                                                        | 192 |
| GhPIN8-2-D | -----                                                        | 125 |
| GhPIN9-A   | -----                                                        | 270 |
| GhPIN3-A   | -----                                                        | 176 |
| GhPIN8-2-A | -----                                                        | 241 |

|            |                                                                                                                     |     |
|------------|---------------------------------------------------------------------------------------------------------------------|-----|
| GhPIN6-A   | K E T S F R D N ----- T K I T V A E M N G D G K E E V G S K ----- Q B M P K A I V M V R L I L                       | 391 |
| GhPIN6-D   | K E T S F R D N ----- T K I T V A E M N G D G K E E V G S K ----- Q B M P K A I V M V R L I L                       | 391 |
| GhPIN1-3-A | E D F S F G N R ----- G L E R E M T N N H E G D K V S D G K P ----- K T M P P A S V I T R L I L                     | 449 |
| GhPIN1-3-D | E D F S F G N R ----- G L E R E M T N N H E G D K V S D G K P ----- K T M P P A S V I T R L I L                     | 449 |
| GhPIN1-1-D | D E F S F G N R R E M ----- N N V Q E S E N N K V G E A I A I A N P ----- K T M P P T S V M T R L I L               | 448 |
| GhPIN1-2-D | E D F S F A K G ----- G M N G E M N K H E G D K V G D S N G K P ----- N T M P P T S V M T R L I L                   | 461 |
| GhPIN1-4-D | D E F T F G N K A A T N G G A D R E G P V L S K L G S S S T T E L N P K I E T K P ----- A A M P P A S V M T R L I L | 329 |
| GhPIN1-4-A | E D F S F A G R D G E E E R E K E G P N G L N K L G S S S T A E L H P K A G G P E S G V G K M P P A S V M T R L I L | 489 |
| GhPIN3-D   | E D F S F A G R D G E E E R E K E G P N G L N K L G S S S T A E L H P K A G G P E S G V G K M P P A S V M T R L I L | 582 |
| GhPIN2-A   | G K S S G G D K D L E I L E E G S K F P T G G S P L S C Q K K L N M E E E V A K K ----- Q Q M P P A S V M T R L I L | 522 |
| GhPIN2-D   | G K S S G G D K D L E I L E E G S K F P T G G S P L S C Q K K L N M E E E V A K K ----- Q Q M P P A S V M T R L I L | 474 |
| GhPIN8-1-A | ----- K T M L T F                                                                                                   | 202 |
| GhPIN8-1-D | ----- K T M L T F                                                                                                   | 198 |
| GhPIN8-2-D | ----- K I M L T F                                                                                                   | 131 |
| GhPIN9-A   | ----- P S M L L K T F                                                                                               | 278 |
| GhPIN3-A   | ----- S Y L Q S T F                                                                                                 | 183 |
| GhPIN8-2-A | ----- S Y L Q S T F                                                                                                 | 248 |

membrane transport (MT) domain

|            |                                                                                                                        |     |
|------------|------------------------------------------------------------------------------------------------------------------------|-----|
| GhPIN6-A   | I V V G R K L S R N P N T Y S S I L G L W S L I S F R W N - V G M P S L V K Y S I R I I S D A G L G M A M F S L G --   | 448 |
| GhPIN6-D   | I V V G R K L S R N P N T Y S S I L G L W S L I S F R W N - V G M P S L V K Y S I R I I S D A G L G M A M F S L G --   | 448 |
| GhPIN1-3-A | I M V W R K L I R N P N T Y S S L G L T W S L I S F R W N - V M P A I I A K S I S I L S D A G L G M A M F S L G --     | 506 |
| GhPIN1-3-D | I M V W R K L I R N P N T Y S S L G L T W S L I S F R W N - V M P A I I A K S I S I L S D A G L G M A M F S L G --     | 506 |
| GhPIN1-1-D | I M V W R K L I R N P N T Y S S L G L T W S L I S F R W N - V M P A I I A K S I S I L S D A G L G M A M F S L G --     | 505 |
| GhPIN1-2-D | I M V W R K L I R N P N T Y S S L G L T W S L I S F R W N - V M P A I I A K S I S I L S D A G L G M A M F S L G --     | 518 |
| GhPIN1-4-D | I M V W R K L I R N P N T Y S S L G L T W S L I S F R W N - V M P A I I A K S I S I L S N A G L G M A M F S L G --     | 486 |
| GhPIN1-4-A | I M V W R K L I R N P N T Y S S L G L V W S L I A F R W H - V S M P K I I E K S I S I L S D A G L G M A M F S I V S G  | 548 |
| GhPIN3-D   | I M V W R K L I R N P N T Y S S L G L V W S L I A F R W H - V S M P K I I E K S I S I L S D A G L G M A M F S L G --   | 539 |
| GhPIN2-A   | I M V W R K L I R N P N T Y S S L G L T W S L I S F R W N - V M P T I V S G S T A I L S D A G L G M A M F S L G --     | 579 |
| GhPIN2-D   | I M V W R K L I R N P N T Y S S L G L T W S L I S F R W N - V M P T I V S G S T A I L S D A G L G M A M F S L G --     | 531 |
| GhPIN8-1-A | I T V G K K L I A N P N T H A T L L G L I W A S I Q F R W N - I K F P A I I E K S I A I L S S G L G M A M F S L G --   | 259 |
| GhPIN8-1-D | I T V G K K L I A N P N T H A T L L G L I W A S I Q F R L W N - I K F P A I I E K S I A I L S S G L G M A M F S L G -- | 256 |
| GhPIN8-2-D | I T V G K K L I A N P N T H A A W L G L I W A G I R F R W E - I K F P A I I Q N S L S I L A S C ----- G L G --         | 181 |
| GhPIN9-A   | R K V W L K L I R N P N T Y S S L G L S W A L V S C R W D - I K K F Q I M E N S V T I L S A G L G M A M F S L G --     | 335 |
| GhPIN3-A   | P I V V K M I T P F A P L E A V L L S S L L A C S V E S G N V V R F N S S I G N A S L V S D A S L V S R L Q S L S G -  | 242 |
| GhPIN8-2-A | P I V V K M I T P F A P L E A V L L S S L L A C S I E S G N V V R F K S S I V N A S L A S D A S L V S R L Q S L S G -  | 307 |

|            |                                                                                                                         |     |
|------------|-------------------------------------------------------------------------------------------------------------------------|-----|
| GhPIN6-A   | ----- L F M A L Q P N I I A C G T K R A T M G M V I R F L G G P V I M S T V S I A L                                     | 487 |
| GhPIN6-D   | ----- L F M A L Q P N I I A C G T K R A T M G M V I R F L G G P V I M S T A S I A L                                     | 487 |
| GhPIN1-3-A | ----- L F M A L Q P N I I A C G N S V A A F A M A V R F L A G P A V M A A A S I A V                                     | 545 |
| GhPIN1-3-D | ----- L F M A L Q P N I I A C G N S V A A F A M A V R F L A G P A V M A A A S I A V                                     | 545 |
| GhPIN1-1-D | ----- L F M A L Q P N I I A C G N S V A A F A M A V R F L A G P A V M A A A S I A V                                     | 544 |
| GhPIN1-2-D | ----- L F M A L Q P N I I A C G N S V A A F A M A V R F L A G P A V M A A A S I A V                                     | 557 |
| GhPIN1-4-D | ----- L F M A L Q P N I I A C G N T I A T F A M A V R F L A G P A V M A A A S I A V                                     | 425 |
| GhPIN1-4-A | P G S V G I G C D R R Q L G H Q L V K V G L F M A L Q P N I I A C G N S V A T F A M A V R F L A G P A V M A A A S I A V | 608 |
| GhPIN3-D   | ----- L F M A L Q P N I I A C G N S V A T F A M A V R F L A G P A V M A A A S I A V                                     | 578 |
| GhPIN2-A   | ----- L F M A L Q P N I I A C G K S V A T F S M A V R F L A G P A V I A A T S I A I                                     | 618 |
| GhPIN2-D   | ----- L F M A L Q P N I I A C G K S V A T F S M A V R F L A G P A V I A A T S I A I                                     | 570 |
| GhPIN8-1-A | ----- L F M A S R E S I I A C G I R M A T V A M I M K F I A G P A I M A A A S T I L                                     | 298 |
| GhPIN8-1-D | ----- L F M A S R E S I I A C G I R M A T V A M I M K F I A G P A I M A A A S T I L                                     | 295 |
| GhPIN8-2-D | ----- L F M A S C R S R I A C G I R M T A V A M V M K F M A G P A I A A S S A A L                                       | 220 |
| GhPIN9-A   | ----- L F M A L Q P N I I A C G K K I A L G M V A R F I A G P A V M A I A S I A V                                       | 374 |
| GhPIN3-A   | ----- G V G A V I L S V M L L H F T G F F V G Y I S A T I C R F R E A E R R A I S I E V                                 | 283 |
| GhPIN8-2-A | ----- D L G A V I L S V M L L H F I G F F V G Y I S A I C R F R E A E R R A I S I E V                                   | 348 |

|            |                                                                                                                           |     |
|------------|---------------------------------------------------------------------------------------------------------------------------|-----|
| GhPIN6-A   | G L R G A K L E A A I V Q A A L P Q G I V P F V F A K E Y N G L H P D I L S T G -----                                     | 487 |
| GhPIN6-D   | G L R G A K L E A A I V Q A A L P Q G I V P F V F A K E Y N G L H P D I L S T G V I F G M L V S L F V T L L Y Y I L L G I | 487 |
| GhPIN1-3-A | G L R G V L L R V A I V Q A A L P Q G I V P F V F A K E Y N G L H P D I L S T A V I F G M L I A L E T T L V Y Y I L L G L | 545 |
| GhPIN1-3-D | G L R G V L L R V A I V Q A A L P Q G I V P F V F A K E Y N G L H P D I L S T A V I F G M L I A L E T T L V Y Y I V L G L | 545 |
| GhPIN1-1-D | G L R G V L L R V A I V Q A A L P Q G I V P F V F A K E Y N G L H P D I L S T A -----                                     | 544 |
| GhPIN1-2-D | G L R G V L L R V A I V Q A A L P Q G I V P F V F A K E Y N G L H P D I L S T A V I F G M L I A L E T T L V Y Y I L L G I | 557 |
| GhPIN1-4-D | G L R G V L L R V A I V Q A A L P Q G I V P F V F A K E Y N G L H P D I L S T G V I F G M L I A L E T T L V Y Y I L L G L | 425 |
| GhPIN1-4-A | G L R G T L L R V A I V Q A A L P Q G I V P F V F A K E Y N V H E A I L S T A V I F G M L I A L E T T L V Y Y I L L G L   | 608 |
| GhPIN3-D   | G L R G T L L R V A I V Q A A L P Q G I V P F V F A K E Y N V H E A I L S T A V I F G M L I A L E T T L V Y Y I L L G L   | 578 |
| GhPIN2-A   | G L R G V L L R V A I V Q A A L P Q G I V P F V F A K E Y N G L H P D I L S T A V I F G M L I A L E T T I L Y Y V L L G L | 618 |
| GhPIN2-D   | G L R G V L L R V A I V Q A A L P Q G I V P F V F A K E Y N G L H P D I L S T A V I F G M L I A L E T T I L Y Y V L L G L | 570 |
| GhPIN8-1-A | G L R G K L L R V A I V Q A A L P Q G I V P F V F A K E Y N G L H P D I L S T G V I F G M L I A L E V A L V Y Y I L L A L | 298 |
| GhPIN8-1-D | G L R G K L L R V A I V Q A A L P Q G I V P F V F A K E Y N G L H P D I L S T G V I F G M L I A L E V A L V Y Y I L L A L | 295 |
| GhPIN8-2-D | G L R A D Y -----                                                                                                         | 220 |
| GhPIN9-A   | G L R G T T L R L S I V Q A A L P Q G I V P F V F S R E Y N G L H P D G D I W N D S E S A H N N S I L H C V G Y L R S H I | 434 |
| GhPIN3-A   | G M Q N S S L G V V L A T H T F T S F V V A L P P A M S A V I M N I M G S L G F F W R Q I S G S K Q E I E D Q E ---       | 283 |
| GhPIN8-2-A | H S E F Y T R S L M N S S Y I A L H V F D E I S H S G W H A K F F I R S G I G N N S F H F S G S V T G R H V G S D Y       | 408 |

|            |                                    |     |
|------------|------------------------------------|-----|
| GhPIN6-A   | -----                              | 487 |
| GhPIN6-D   | -----                              | 487 |
| GhPIN1-3-A | -----                              | 545 |
| GhPIN1-3-D | -----                              | 545 |
| GhPIN1-1-D | -----                              | 544 |
| GhPIN1-2-D | -----                              | 557 |
| GhPIN1-4-D | -----                              | 425 |
| GhPIN1-4-A | -----                              | 608 |
| GhPIN3-D   | -----                              | 578 |
| GhPIN2-A   | -----                              | 618 |
| GhPIN2-D   | -----                              | 570 |
| GhPIN8-1-A | -----                              | 298 |
| GhPIN8-1-D | -----                              | 295 |
| GhPIN8-2-D | -----                              | 220 |
| GhPIN9-A   | WKDENINMRNSAALFREIQGYGQNQQQYSYVFLS | 470 |
| GhPIN3-A   | -----                              | 283 |
| GhPIN8-2-A | EYNG-----                          | 412 |

**Figure S1. Multiple sequence alignment of the deduced amino acid sequences of predicted PINs from *G. hirsutum*.**

The graphical view of the alignment was generated by BioEdit using ClustalW. Black under lines indicates the auxin efflux carrier (ACE) domain and red under lines highlight the membrane transport (MT) domain.
