# Supplementary material for: The PIN gene family in cotton (Gossypium hirsutum): genome-wide identification and gene expression analyses during root development and abiotic stress responses
Source: PubMed Central journal article supplement (PMC5496148; doi:10.1186/s12864-017-3901-5), 2017-07-03
Supplement: 12864_2017_3901_MOESM5_ESM.pdf [file 12864_2017_3901_MOESM5_ESM.pdf]

**Table S3. The number of PIN genes identified across 7 plant species.**

| Species                      | Long PIN |      |          |      | Short PIN |      |      | Total |
|------------------------------|----------|------|----------|------|-----------|------|------|-------|
|                              | PIN1     | PIN2 | PIN3/4/7 | PIN9 | PIN6      | PIN5 | PIN8 |       |
| <i>G. hirsutum</i> -BGI      | 6        | 2    | 2        | 1    | 2         | 0    | 4    | 17    |
| <i>G. hirsutum</i> -NBI      | 7        | 2    | 2        | 1    | 2         | 0    | 2    | 16    |
| <i>G. barbadense</i> -NBI    | 6        | 2    | 8        | 1    | 3         | 0    | 2    | 22    |
| <i>G. barbadense</i> -Esquel | 6        | 1    | 4        | 1    | 2         | 0    | 1    | 15    |
| <i>A. thaliana</i>           | 1        | 1    | 3        | 0    | 1         | 1    | 1    | 8     |
| <i>G. arboreum</i>           | 4        | 1    | 2        | 1    | 1         | 2    | 1    | 12    |
| <i>G. raimondii</i>          | 4        | 1    | 1        | 1    | 1         | 1    | 1    | 10    |
