# Supplementary material for: The PIN gene family in cotton (Gossypium hirsutum): genome-wide identification and gene expression analyses during root development and abiotic stress responses
Source: PubMed Central journal article supplement (PMC5496148; doi:10.1186/s12864-017-3901-5), 2017-07-03
Supplement: 12864_2017_3901_MOESM6_ESM.pdf [file 12864_2017_3901_MOESM6_ESM.pdf]

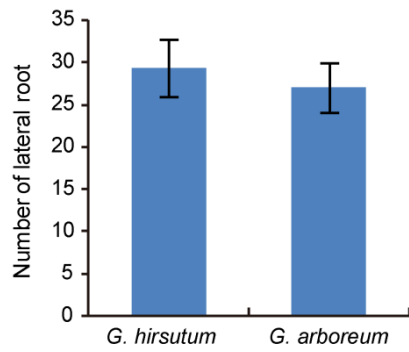

**Figure S2. Measurements of lateral root number of three-week-old *G. hirsutum* and *G. arboreum* seedlings.**

Statistical analyses were obtained from three replicates with a total of 30 seedlings for each species. The lateral root number in this figure represents the average number of all investigated lateral roots. Data is represented as means  $\pm$  SE.
